# Supplementary material for: DNA methyltransferase isoforms expression in the temporal lobe of epilepsy patients with a history of febrile seizures
Source: PubMed Central journal article supplement (PMC6701147; doi:10.1186/s13148-019-0721-2), 2019-08-19

# Additional file 1

**A** DNMT1 WB-HIPPOCAMPUS

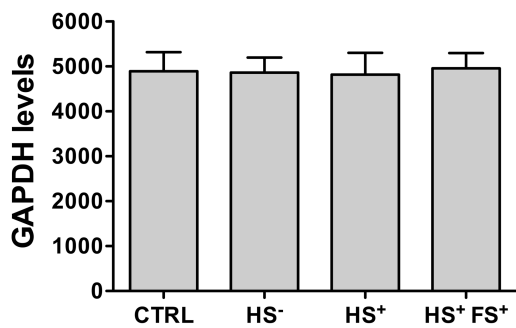

**B** DNMT1 WB-NEOCORTEX

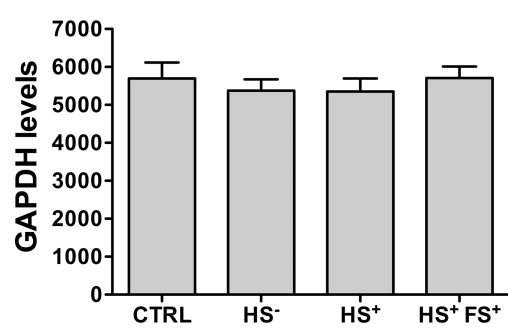

**C** DNMT3a WB-HIPPOCAMPUS

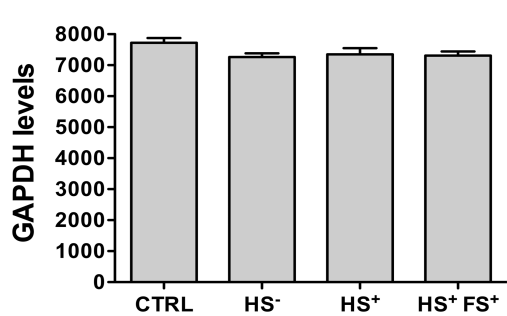

**D** DNMT3a WB-NEOCORTEX

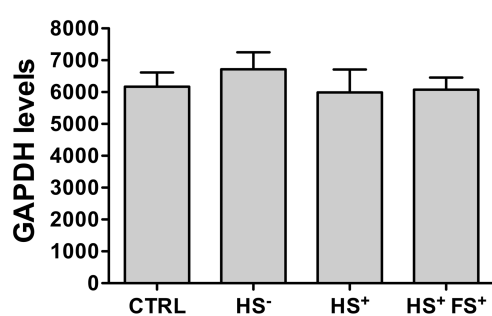

Supplement: 13148_2019_721_MOESM1_ESM.pdf [file 13148_2019_721_MOESM1_ESM.pdf]
