# Supplementary material for: DNA methyltransferase isoforms expression in the temporal lobe of epilepsy patients with a history of febrile seizures
Source: PubMed Central journal article supplement (PMC6701147; doi:10.1186/s13148-019-0721-2), 2019-08-19

# Additional file 3

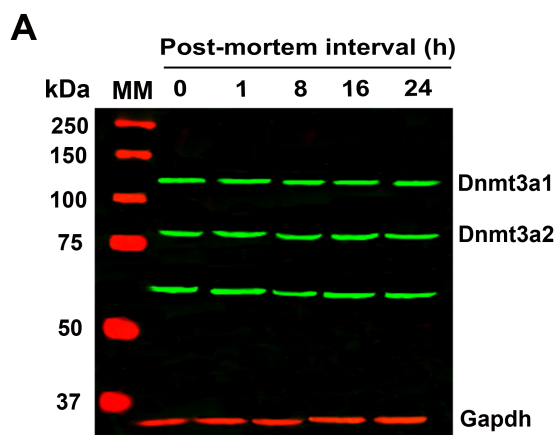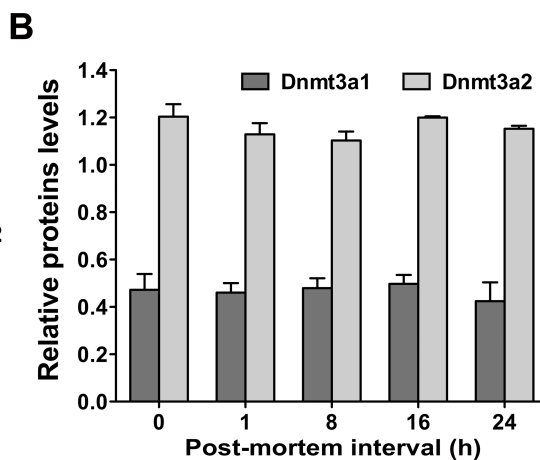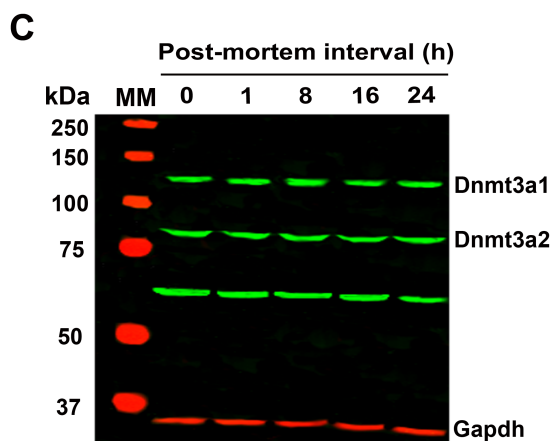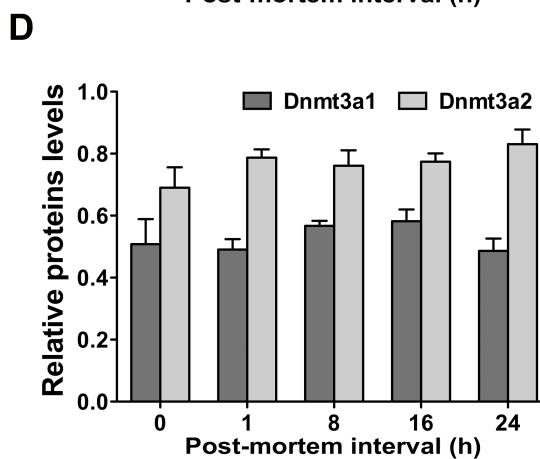

Supplement: 13148_2019_721_MOESM3_ESM.pdf [file 13148_2019_721_MOESM3_ESM.pdf]
